# Supplementary material for: Association of APOE4 genotype and treatment with cognitive outcomes in breast cancer survivors over time
Source: PubMed Central journal article supplement (PMC8417038; doi:10.1038/s41523-021-00327-4), 2021-09-03
Supplement: 41523_2021_327_MOESM1_ESM.pdf [file 41523_2021_327_MOESM1_ESM.pdf]

Supplementary Materials

Supplementary Figure 1: Recruitment Flow Diagram

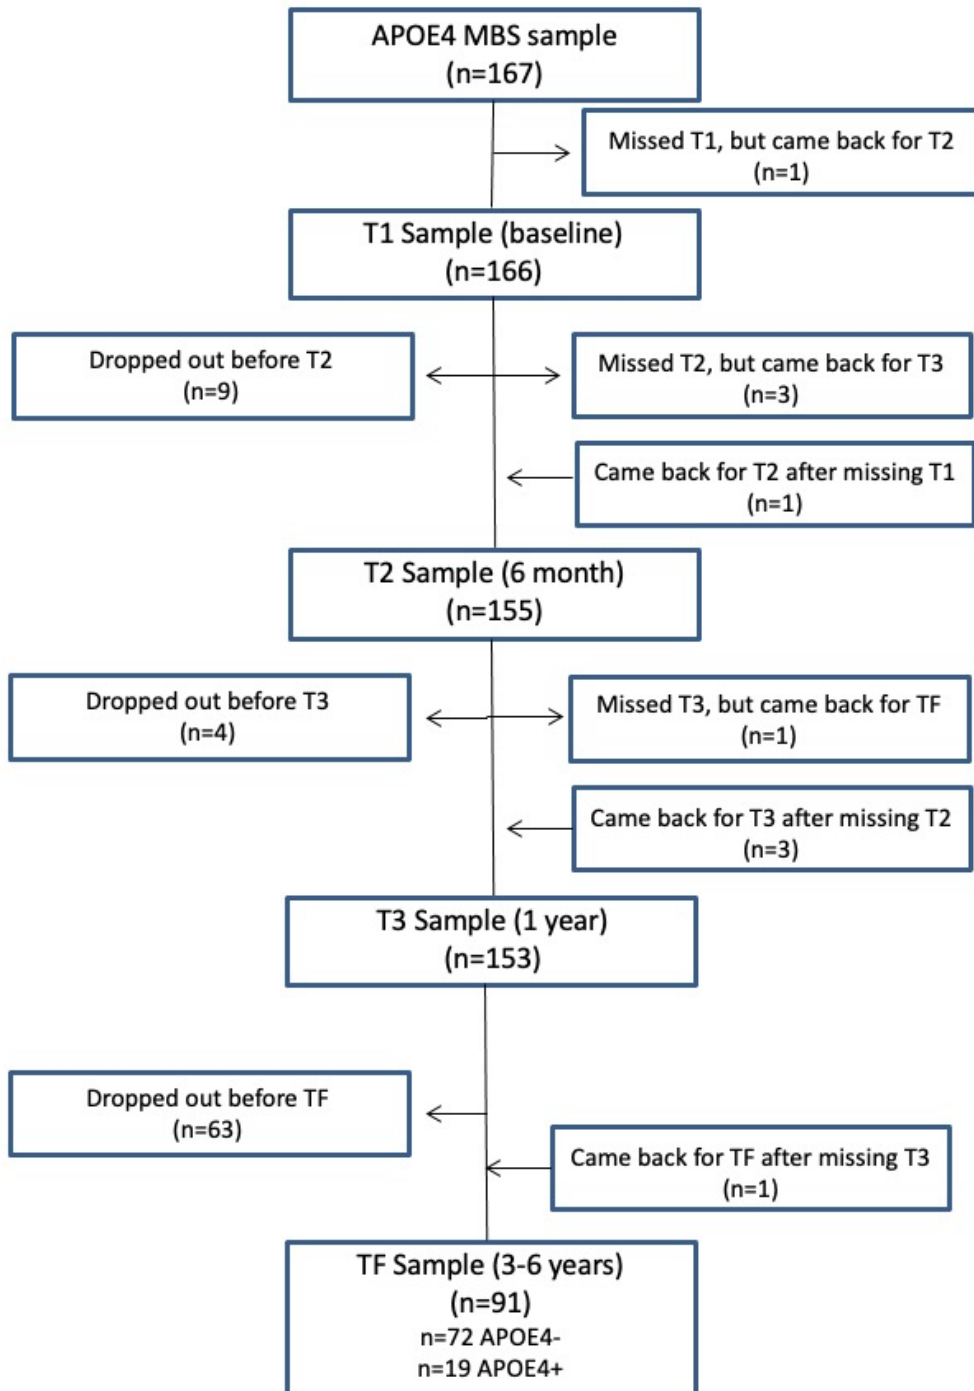

Supplementary Table 1: Estimates and F-Tests of Fixed Effects in Mixed Effects Models of Cognitive Domains\*

|                                                                     | Learning                        | Memory                          | Attention                        | Visuospatial                    | Executive Function              | Processing Speed                |
|---------------------------------------------------------------------|---------------------------------|---------------------------------|----------------------------------|---------------------------------|---------------------------------|---------------------------------|
| APOE4 x Time                                                        | F(3, 186.78) = 1.66, p=.18      | F(3, 187.06) = 0.29, p=.83      | F(3, 184.41) = 0.1.20, p=.31     | F(3, 208.28) = .75, p=.52       | F(3, 145.09) = .16, p=.92       | F(3, 159.64) = 0.56, p=.64      |
| <i>APOE4 (ref=none) * Time at 3-6 yrs (ref=BL)</i>                  | 0.11                            | 0.06                            | 0.21                             | -0.12                           | 0.13                            | -0.01                           |
| <i>APOE4 (ref=none) * Time at 12 mos (ref=BL)</i>                   | -0.14                           | -0.03                           | 0.05                             | -0.10                           | 0.02                            | -0.09                           |
| <i>APOE4 (ref=none) * Time at 6 mos (ref=BL)</i>                    | -0.08                           | -0.05                           | 0.06                             | -0.16                           | -0.01                           | 0.001                           |
| Chemo x APOE4                                                       | -2.6 F(1, 157.34) = 1.23, p=.27 | -2.7 F(1, 156.75) = 1.53, p=.22 | -0.001 F(1, 149.29) = .00, p=.99 | -2.5 F(1, 150.32) = 1.42, p=.23 | 0.23 F(1, 157.75) = 0.89, p=.35 | 0.21 F(1, 156.66) = 0.80, p=.37 |
| Chemo x APOE4 x Time                                                | F(2, 161.41) = 0.14, p=.87      | F(2, 154.34) = .80, p=.45       | F(3, 181.15) = 1.61, p=.19       | F(3, 204.44) = 0.916, p=.43     | F(3, 141.95) = 0.16, p=.93      | F(3, 159.14) = 1.26, p=.29      |
| <i>APOE4 (ref=none) * Chemo (ref=no) * Time at 3-6 yrs (ref=BL)</i> | -0.01                           | -0.04                           | 0.31                             | -0.31                           | 0.03                            | -0.17                           |
| <i>APOE4 (ref=none) * Chemo (ref=no) * Time at 12 mos (ref=BL)</i>  | 0.05                            | -0.15                           | -0.01                            | -0.13                           | 0.08                            | -0.29                           |
| <i>APOE4 (ref=none) * Chemo (ref=no) * Time at 6 mos (ref=BL)</i>   | -0.04                           | 0.01                            | -0.05                            | -0.10                           | 0.09                            | -0.33                           |

|                                                 |       |                            |       |                            |       |                            |       |                            |       |                            |       |                            |
|-------------------------------------------------|-------|----------------------------|-------|----------------------------|-------|----------------------------|-------|----------------------------|-------|----------------------------|-------|----------------------------|
| ET x APOE4                                      | -0.56 | F(1, 158.71) = 4.17, p=.04 | -0.48 | F(1, 158.67) = 3.22, p=.07 | -0.41 | F(1, 150.62) = 3.13, p=.08 | -0.46 | F(1, 155.01) = 3.56, p=.06 | -0.37 | F(1, 158.69) = 1.56, p=.21 | -0.42 | F(1, 158.39) = 2.42, p=.12 |
| ET x APOE4 x Time                               |       | F(3, 191.36) = 0.59, p=.62 |       | F(3, 175.55) = 1.41, p=.24 |       | F(3, 175.92) = 1.23, p=.30 |       | F(3, 202.89) = 0.61, p=.61 |       | F(2, 143.71) = 1.43, p=.24 |       | F(3, 160.49) = .83, p=.48  |
| <i>APOE4 (ref=none)</i>                         |       |                            |       |                            |       |                            |       |                            |       |                            |       |                            |
| <i>* ET (ref=no) * Time at 3-6 yrs (ref=BL)</i> | -0.37 |                            | -0.34 |                            | -0.34 |                            | 0.07  |                            | -0.85 |                            | 0.02  |                            |
| <i>APOE4 (ref=none)</i>                         |       |                            |       |                            |       |                            |       |                            |       |                            |       |                            |
| <i>* ET (ref=no) * Time at 12 mos (ref=BL)</i>  | -0.02 |                            | 0.14  |                            | 0.14  |                            | -0.18 |                            | -0.21 |                            | -0.08 |                            |
| <i>APOE4 (ref=none)</i>                         |       |                            |       |                            |       |                            |       |                            |       |                            |       |                            |
| <i>* ET (ref=no) * Time at 6 mos (ref=BL)</i>   | 0.02  |                            | 0.15  |                            | 0.15  |                            | -0.16 |                            | -0.16 |                            | 0.07  |                            |

\*Main effects and two-way interactions were examined separately in iterative models; models with three-way interactions included all subordinate terms. Data are assumed to be missing at random.

ET=endocrine therapy (no/yes); time, BL=baseline, 6-month, 12-month, and 3-year to 6-year visits (categorical). The fixed effects included in the models were age, intelligence quotient, chemotherapy exposure, and race, and all models included a random intercept.

Supplementary Figure 2: Cognitive Domain Scores by APOE4 status over time. Models adjusted for age, IQ, chemotherapy, and race.

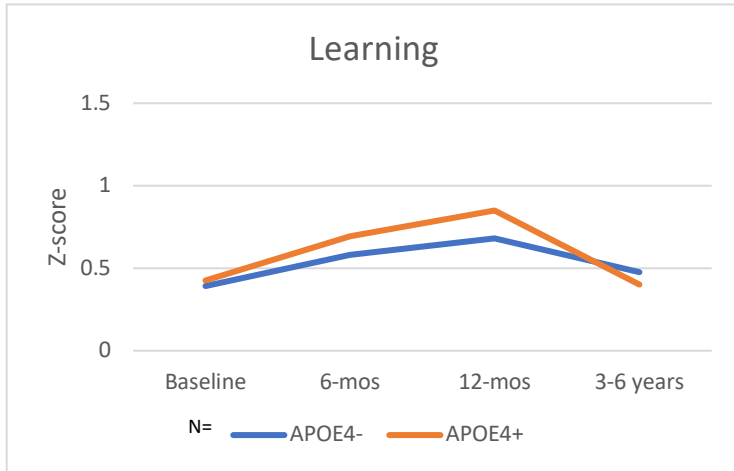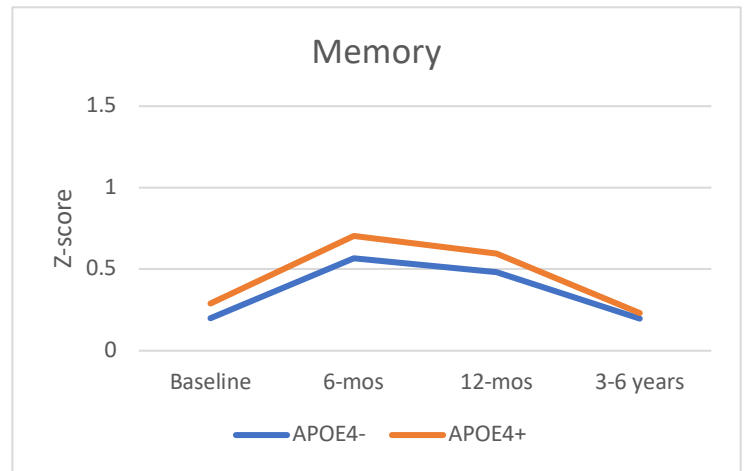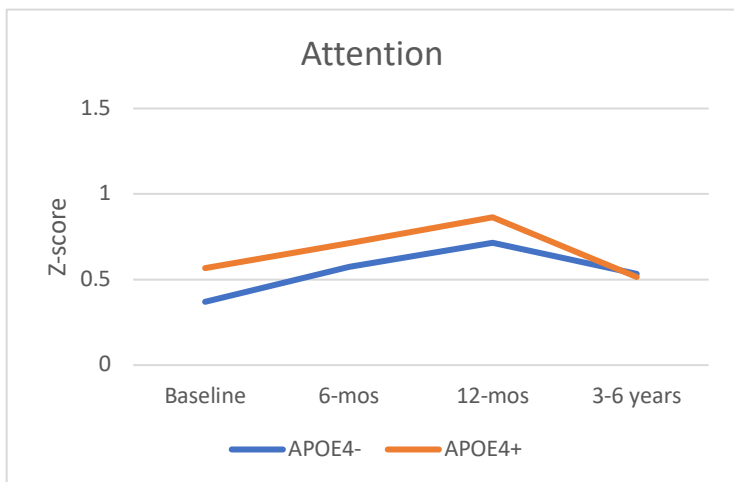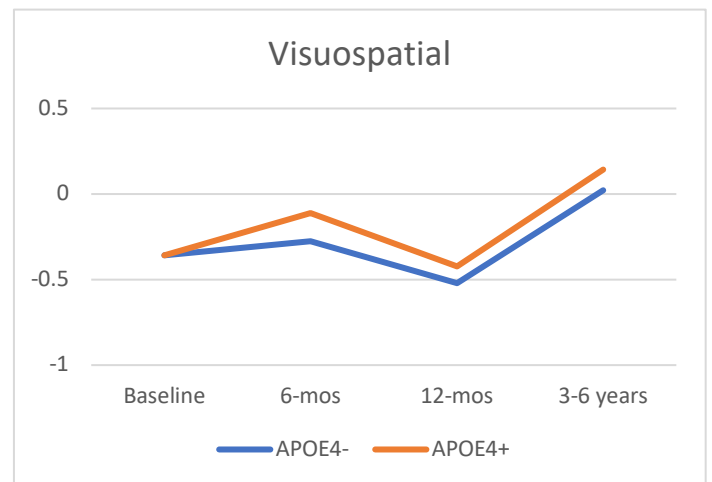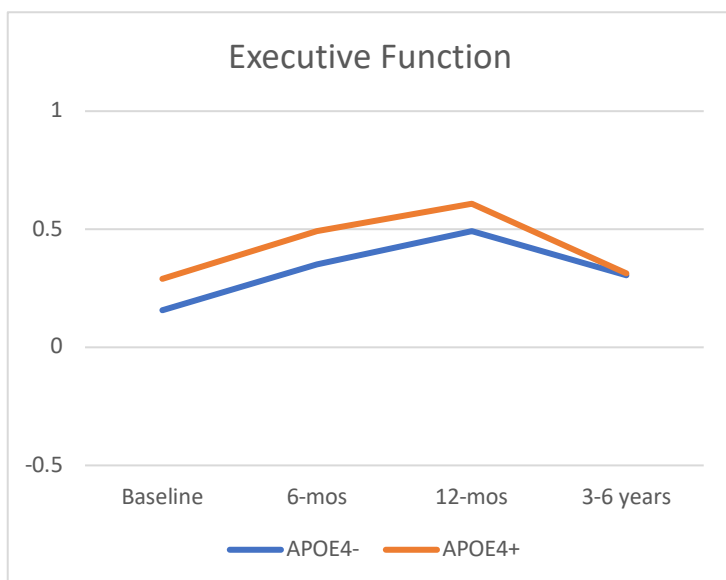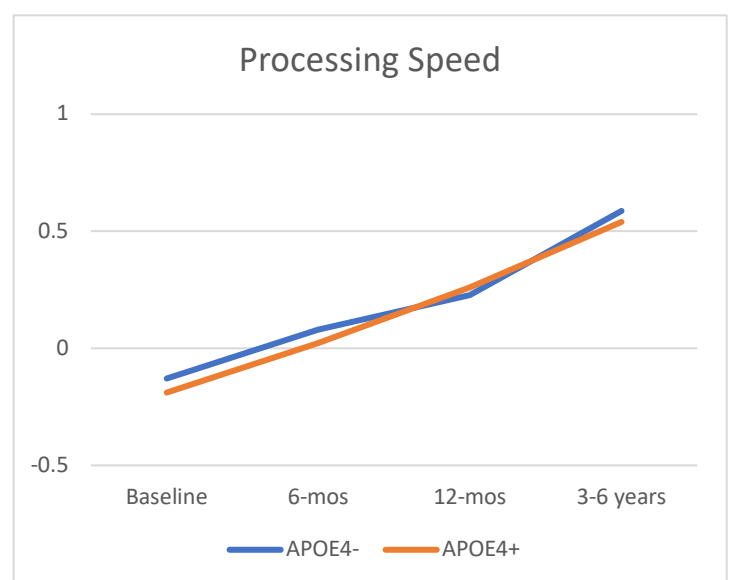

Data for Supplementary Figure 2

|                     |           | Mean   | Std. Error | 95% Confidence Interval |             |
|---------------------|-----------|--------|------------|-------------------------|-------------|
|                     |           |        |            | Lower Bound             | Upper Bound |
| <b>Learning</b>     |           |        |            |                         |             |
| e4-                 | Baseline  | 0.392  | 0.057      |                         |             |
|                     | 6-mos     | 0.58   | 0.057      | 0.468                   | 0.693       |
|                     | 12-mos    | 0.681  | 0.058      | 0.568                   | 0.795       |
|                     | 3-6 years | 0.477  | 0.079      | 0.322                   | 0.632       |
| e4+                 | Baseline  | 0.424  | 0.111      | 0.205                   | 0.644       |
|                     | 6-mos     | 0.692  | 0.112      | 0.471                   | 0.913       |
|                     | 12-mos    | 0.85   | 0.114      | 0.625                   | 1.074       |
|                     | 3-6 years | 0.401  | 0.151      | 0.104                   | 0.699       |
| <b>Memory</b>       |           |        |            |                         |             |
| e4-                 | Baseline  | 0.198  | 0.055      | 0.089                   | 0.306       |
|                     | 6-mos     | 0.567  | 0.054      | 0.461                   | 0.673       |
|                     | 12-mos    | 0.48   | 0.052      | 0.378                   | 0.582       |
|                     | 3-6 years | 0.197  | 0.069      | 0.06                    | 0.334       |
| e4+                 | Baseline  | 0.288  | 0.108      | 0.076                   | 0.501       |
|                     | 6-mos     | 0.704  | 0.105      | 0.497                   | 0.912       |
|                     | 12-mos    | 0.597  | 0.102      | 0.395                   | 0.799       |
|                     | 3-6 years | 0.231  | 0.133      | -0.031                  | 0.493       |
| <b>Attention</b>    |           |        |            |                         |             |
| e4-                 | Baseline  | 0.37   | 0.049      | 0.273                   | 0.467       |
|                     | 6-mos     | 0.574  | 0.047      | 0.482                   | 0.666       |
|                     | 12-mos    | 0.715  | 0.045      | 0.627                   | 0.803       |
|                     | 3-6 years | 0.533  | 0.062      | 0.41                    | 0.656       |
| e4+                 | Baseline  | 0.566  | 0.097      | 0.375                   | 0.756       |
|                     | 6-mos     | 0.713  | 0.09       | 0.534                   | 0.891       |
|                     | 12-mos    | 0.864  | 0.088      | 0.691                   | 1.038       |
|                     | 3-6 years | 0.515  | 0.119      | 0.279                   | 0.751       |
| <b>Visuospatial</b> |           |        |            |                         |             |
| e4-                 | Baseline  | -0.359 | 0.057      | -0.471                  | -0.246      |
|                     | 6-mos     | -0.275 | 0.057      | -0.387                  | -0.164      |
|                     | 12-mos    | -0.521 | 0.055      | -0.63                   | -0.412      |
|                     | 3-6 years | 0.022  | 0.081      | -0.138                  | 0.182       |
| e4+                 | Baseline  | -0.359 | 0.112      | -0.58                   | -0.139      |
|                     | 6-mos     | -0.112 | 0.11       | -0.329                  | 0.104       |

|                    |           |        |       |        |        |
|--------------------|-----------|--------|-------|--------|--------|
|                    | 12-mos    | -0.423 | 0.109 | -0.639 | -0.207 |
|                    | 3-6 years | 0.143  | 0.156 | -0.165 | 0.451  |
| Executive Function |           |        |       |        |        |
| e4-                | Baseline  | 0.157  | 0.058 | 0.042  | 0.272  |
|                    | 6-mos     | 0.351  | 0.06  | 0.233  | 0.468  |
|                    | 12-mos    | 0.492  | 0.059 | 0.376  | 0.609  |
|                    | 3-6 years | 0.306  | 0.106 | 0.096  | 0.516  |
| e4+                | Baseline  | 0.29   | 0.114 | 0.065  | 0.516  |
|                    | 6-mos     | 0.493  | 0.117 | 0.263  | 0.723  |
|                    | 12-mos    | 0.608  | 0.117 | 0.377  | 0.839  |
|                    | 3-6 years | 0.314  | 0.205 | -0.091 | 0.719  |
| Processing Speed   |           |        |       |        |        |
| e4-                | Baseline  | -0.129 | 0.06  | -0.248 | -0.01  |
|                    | 6-mos     | 0.081  | 0.056 | -0.03  | 0.192  |
|                    | 12-mos    | 0.226  | 0.057 | 0.113  | 0.339  |
|                    | 3-6 years | 0.587  | 0.104 | 0.382  | 0.792  |
| e4+                | Baseline  | -0.189 | 0.119 | -0.423 | 0.046  |
|                    | 6-mos     | 0.023  | 0.11  | -0.195 | 0.241  |
|                    | 12-mos    | 0.261  | 0.113 | 0.037  | 0.484  |
|                    | 3-6 years | 0.54   | 0.2   | 0.144  | 0.937  |

Supplementary Figure 3: Cognitive Domain scores by APOE4 status and endocrine therapy over time. Models adjusted for age, IQ, chemotherapy, and race.

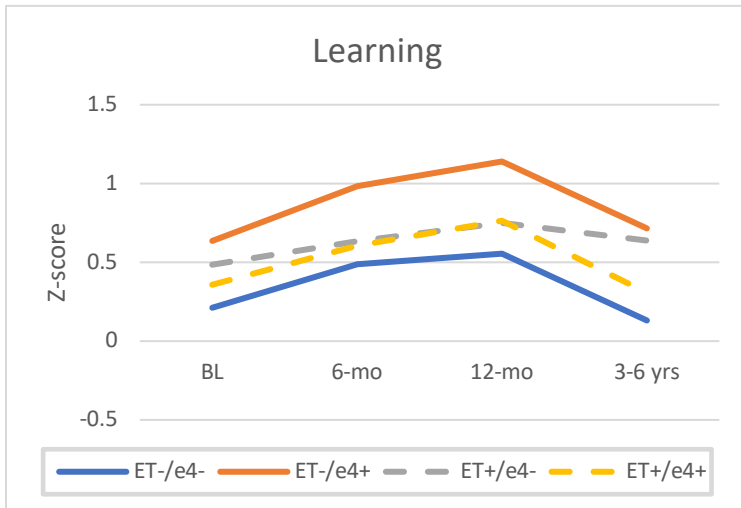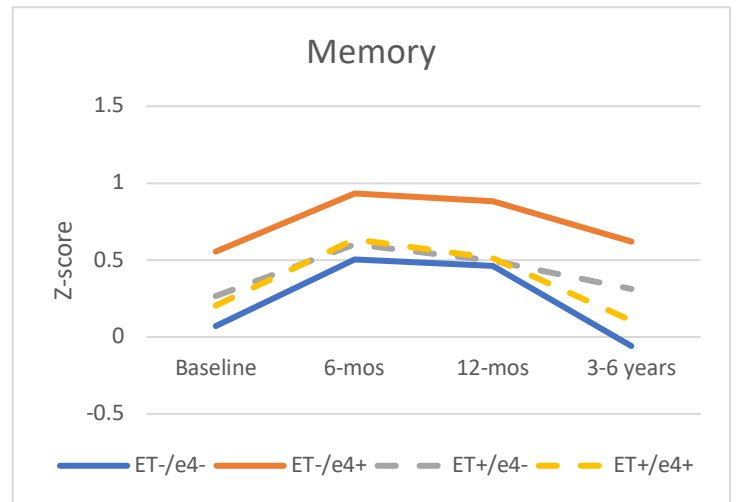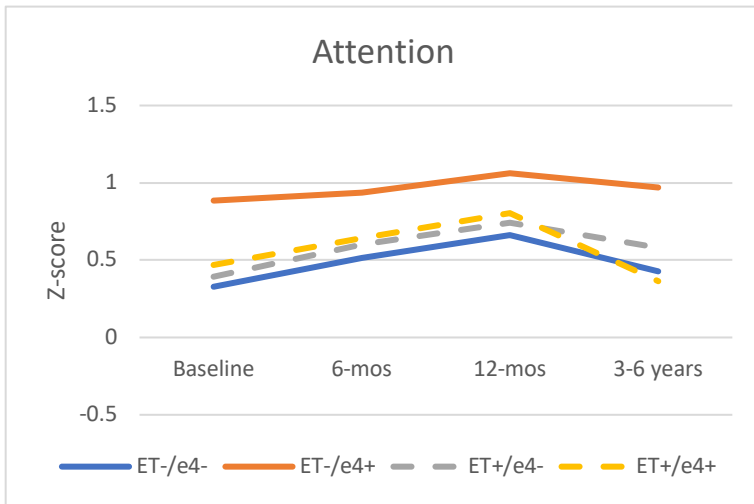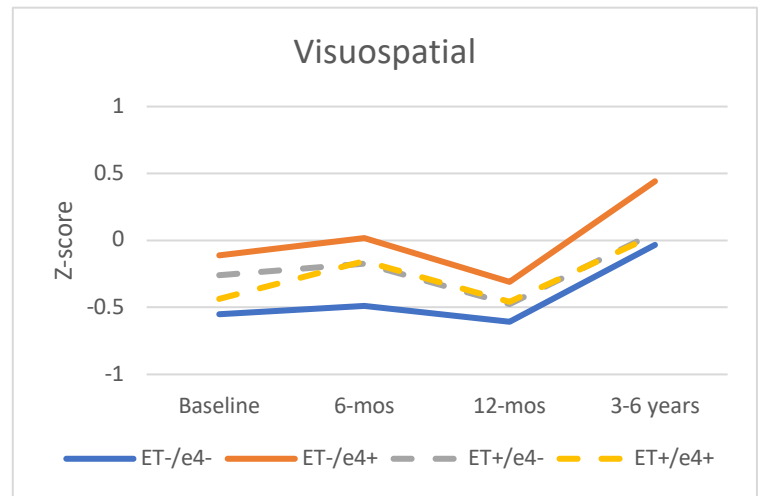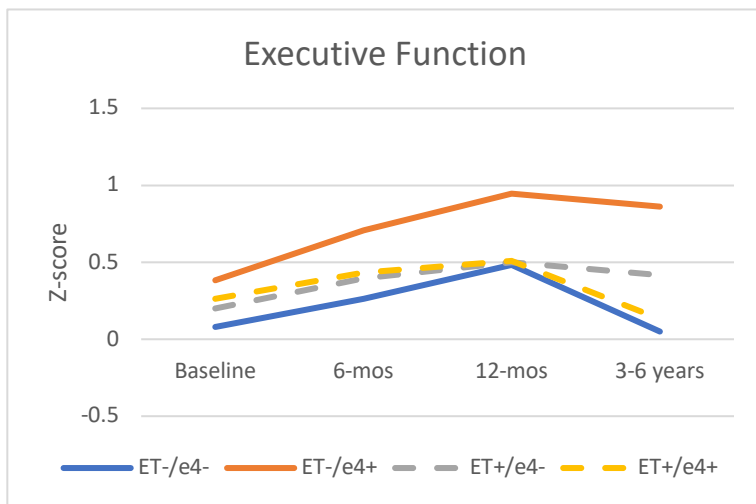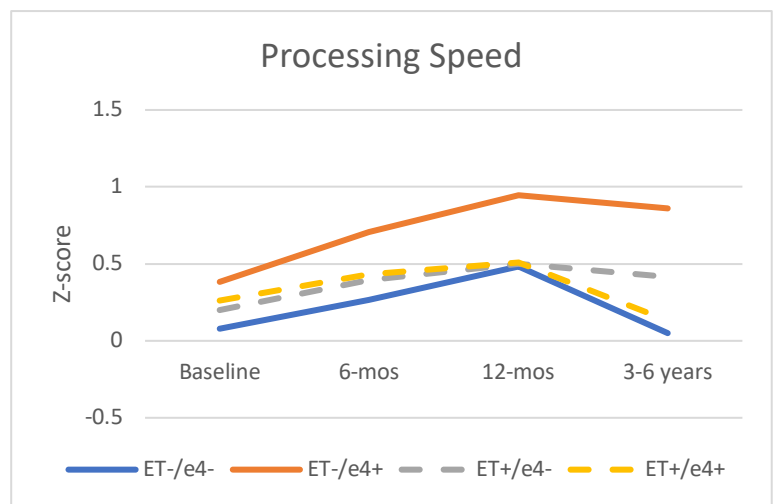

Data for Supplementary Figure 3

| Learning |           | Mean      | Std. Error | 95% Confidence Interval |             |      |
|----------|-----------|-----------|------------|-------------------------|-------------|------|
|          |           |           |            | Lower Bound             | Upper Bound |      |
| ET-/e4-  | Baseline  | 0.21      | 0.10       | 0.03                    | 0.40        |      |
|          | 6-mos     | 0.49      | 0.10       | 0.29                    | 0.68        |      |
|          | 12-mos    | 0.56      | 0.10       | 0.36                    | 0.75        |      |
|          | 3-6 years | 0.13      | 0.14       | -0.14                   | 0.40        |      |
| ET+/e4-  | Baseline  | 0.49      | 0.07       | 0.35                    | 0.62        |      |
|          | 6-mos     | 0.64      | 0.07       | 0.50                    | 0.77        |      |
|          | 12-mos    | 0.75      | 0.07       | 0.61                    | 0.89        |      |
|          | 3-6 years | 0.64      | 0.09       | 0.46                    | 0.82        |      |
| ET-/e4+  | Baseline  | 0.64      | 0.23       | 0.19                    | 1.08        |      |
|          | 6-mos     | 0.99      | 0.23       | 0.53                    | 1.44        |      |
|          | 12-mos    | 1.14      | 0.23       | 0.68                    | 1.60        |      |
|          | 3-6 years | 0.72      | 0.29       | 0.14                    | 1.29        |      |
| ET+/e4+  | Baseline  | 0.36      | 0.13       | 0.11                    | 0.61        |      |
|          | 6-mos     | 0.61      | 0.13       | 0.36                    | 0.86        |      |
|          | 12-mos    | 0.76      | 0.13       | 0.51                    | 1.02        |      |
|          | 3-6 years | 0.31      | 0.17       | -0.03                   | 0.64        |      |
| Memory   | ET-/e4-   | Baseline  | 0.07       | 0.09                    | -0.11       | 0.25 |
|          |           | 6-mos     | 0.50       | 0.10                    | 0.32        | 0.69 |
|          |           | 12-mos    | 0.46       | 0.09                    | 0.29        | 0.64 |
|          |           | 3-6 years | -0.06      | 0.12                    | -0.29       | 0.18 |
| ET+/e4-  | Baseline  | 0.27      | 0.07       | 0.13                    | 0.40        |      |
|          | 6-mos     | 0.60      | 0.07       | 0.47                    | 0.73        |      |
|          | 12-mos    | 0.50      | 0.06       | 0.37                    | 0.62        |      |
|          | 3-6 years | 0.31      | 0.08       | 0.15                    | 0.48        |      |
| ET-/e4+  | Baseline  | 0.56      | 0.22       | 0.12                    | 0.99        |      |
|          | 6-mos     | 0.93      | 0.22       | 0.50                    | 1.37        |      |
|          | 12-mos    | 0.88      | 0.21       | 0.47                    | 1.30        |      |
|          | 3-6 years | 0.62      | 0.26       | 0.11                    | 1.13        |      |
| ET+/e4+  | Baseline  | 0.21      | 0.12       | -0.04                   | 0.45        |      |
|          | 6-mos     | 0.64      | 0.12       | 0.40                    | 0.87        |      |
|          | 12-mos    | 0.51      | 0.12       | 0.28                    | 0.74        |      |



|              |           |       |      |       |       |
|--------------|-----------|-------|------|-------|-------|
|              | 3-6 years | 0.11  | 0.15 | -0.19 | 0.40  |
| Attention    |           |       |      |       |       |
| ET-/e4-      | Baseline  | 0.33  | 0.08 | 0.16  | 0.49  |
|              | 6-mos     | 0.52  | 0.08 | 0.36  | 0.68  |
|              | 12-mos    | 0.66  | 0.08 | 0.51  | 0.82  |
|              | 3-6 years | 0.43  | 0.11 | 0.21  | 0.64  |
| ET+/e4-      | Baseline  | 0.39  | 0.06 | 0.27  | 0.51  |
|              | 6-mos     | 0.60  | 0.06 | 0.49  | 0.72  |
|              | 12-mos    | 0.74  | 0.05 | 0.63  | 0.85  |
|              | 3-6 years | 0.58  | 0.07 | 0.44  | 0.73  |
| ET-/e4+      | Baseline  | 0.89  | 0.20 | 0.50  | 1.27  |
|              | 6-mos     | 0.94  | 0.19 | 0.56  | 1.31  |
|              | 12-mos    | 1.06  | 0.18 | 0.70  | 1.42  |
|              | 3-6 years | 0.97  | 0.24 | 0.50  | 1.43  |
| ET+/e4+      | Baseline  | 0.47  | 0.11 | 0.25  | 0.68  |
|              | 6-mos     | 0.64  | 0.10 | 0.44  | 0.85  |
|              | 12-mos    | 0.80  | 0.10 | 0.61  | 1.00  |
|              | 3-6 years | 0.36  | 0.14 | 0.09  | 0.63  |
| Visuospatial |           |       |      |       |       |
| ET-/e4-      | Baseline  | -0.55 | 0.10 | -0.74 | -0.36 |
|              | 6-mos     | -0.49 | 0.10 | -0.69 | -0.29 |
|              | 12-mos    | -0.61 | 0.10 | -0.80 | -0.42 |
|              | 3-6 years | -0.03 | 0.15 | -0.32 | 0.26  |
| ET+/e4-      | Baseline  | -0.26 | 0.07 | -0.40 | -0.12 |
|              | 6-mos     | -0.17 | 0.07 | -0.31 | -0.04 |
|              | 12-mos    | -0.48 | 0.07 | -0.61 | -0.34 |
|              | 3-6 years | 0.06  | 0.10 | -0.13 | 0.25  |
| ET-/e4+      | Baseline  | -0.11 | 0.23 | -0.56 | 0.34  |
|              | 6-mos     | 0.02  | 0.23 | -0.44 | 0.47  |
|              | 12-mos    | -0.31 | 0.23 | -0.76 | 0.14  |
|              | 3-6 years | 0.44  | 0.31 | -0.16 | 1.05  |
| ET+/e4+      | Baseline  | -0.44 | 0.13 | -0.69 | -0.19 |
|              | 6-mos     | -0.15 | 0.12 | -0.40 | 0.09  |
|              | 12-mos    | -0.46 | 0.12 | -0.70 | -0.21 |
|              | 3-6 years | 0.04  | 0.18 | -0.32 | 0.40  |

Executive Function

|         |           |      |      |       |      |
|---------|-----------|------|------|-------|------|
| ET-/e4- | Baseline  | 0.08 | 0.10 | -0.12 | 0.27 |
|         | 6-mos     | 0.26 | 0.11 | 0.06  | 0.47 |
|         | 12-mos    | 0.48 | 0.10 | 0.28  | 0.69 |
|         | 3-6 years | 0.05 | 0.19 | -0.32 | 0.43 |

|         |           |      |      |      |      |
|---------|-----------|------|------|------|------|
| ET+/e4- | Baseline  | 0.20 | 0.07 | 0.06 | 0.34 |
|         | 6-mos     | 0.39 | 0.07 | 0.25 | 0.54 |
|         | 12-mos    | 0.50 | 0.07 | 0.36 | 0.64 |
|         | 3-6 years | 0.42 | 0.13 | 0.17 | 0.67 |

|         |           |      |      |       |      |
|---------|-----------|------|------|-------|------|
| ET-/e4+ | Baseline  | 0.38 | 0.23 | -0.08 | 0.85 |
|         | 6-mos     | 0.71 | 0.24 | 0.23  | 1.19 |
|         | 12-mos    | 0.95 | 0.24 | 0.47  | 1.42 |
|         | 3-6 years | 0.86 | 0.40 | 0.07  | 1.65 |

|         |           |      |      |       |      |
|---------|-----------|------|------|-------|------|
| ET+/e4+ | Baseline  | 0.26 | 0.13 | 0.00  | 0.52 |
|         | 6-mos     | 0.43 | 0.13 | 0.17  | 0.70 |
|         | 12-mos    | 0.51 | 0.13 | 0.25  | 0.77 |
|         | 3-6 years | 0.13 | 0.24 | -0.34 | 0.60 |

Processing Speed

|         |           |       |      |       |      |
|---------|-----------|-------|------|-------|------|
| ET-/e4- | Baseline  | -0.12 | 0.10 | -0.32 | 0.09 |
|         | 6-mos     | 0.02  | 0.10 | -0.17 | 0.22 |
|         | 12-mos    | 0.23  | 0.10 | 0.03  | 0.43 |
|         | 3-6 years | 0.59  | 0.19 | 0.21  | 0.96 |

|         |           |       |      |       |      |
|---------|-----------|-------|------|-------|------|
| ET+/e4- | Baseline  | -0.13 | 0.08 | -0.28 | 0.01 |
|         | 6-mos     | 0.11  | 0.07 | -0.03 | 0.24 |
|         | 12-mos    | 0.22  | 0.07 | 0.08  | 0.36 |
|         | 3-6 years | 0.58  | 0.13 | 0.34  | 0.83 |

|         |           |      |      |       |      |
|---------|-----------|------|------|-------|------|
| ET-/e4+ | Baseline  | 0.04 | 0.24 | -0.44 | 0.52 |
|         | 6-mos     | 0.41 | 0.23 | -0.05 | 0.86 |
|         | 12-mos    | 0.54 | 0.24 | 0.07  | 1.01 |
|         | 3-6 years | 0.86 | 0.40 | 0.08  | 1.65 |

|         |           |       |      |       |      |
|---------|-----------|-------|------|-------|------|
| ET+/e4+ | Baseline  | -0.26 | 0.14 | -0.53 | 0.01 |
|         | 6-mos     | -0.09 | 0.13 | -0.33 | 0.16 |
|         | 12-mos    | 0.18  | 0.13 | -0.08 | 0.43 |
|         | 3-6 years | 0.44  | 0.23 | -0.02 | 0.90 |

Supplementary Figure 4: Diagram of the study

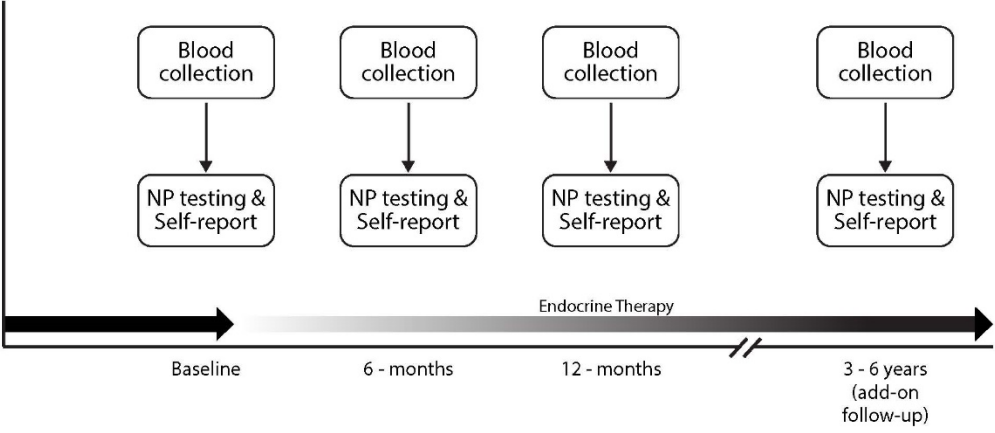

**Supplementary Table 2: Neuropsychological Tests by Domain**

| Domain                | Test/Measure                                          |
|-----------------------|-------------------------------------------------------|
| Learning              | CVLT-II List A Total Trials 1-5                       |
|                       | WMS-III LM I                                          |
|                       | BVMT-R Total Trials 1-3                               |
| Memory                | CVLT-II List A Long Delay Free Recall                 |
|                       | WMS-III LM II                                         |
|                       | BVMT-R Delayed Recall                                 |
|                       | ROCFT 3-minute Delayed Recall                         |
| Attention             | WAIS-III Digit Span, Coding, Letter-Number Sequencing |
|                       | TMT A completion time                                 |
|                       | PASAT Trial 2 total errors                            |
| Visuospatial          | ROCFT copy                                            |
|                       | WAIS-III Block Design                                 |
| Executive Functioning | TMT B                                                 |
|                       | Stroop Color Word Interference <sup>1</sup>           |
|                       | Verbal Fluency (FAS)                                  |
| Processing Speed      | Grooved Pegboard <sup>2</sup>                         |
|                       | Stroop Word Reading & Color Naming                    |

BVMT-R=Brief Visuospatial Memory Test-Revised<sup>3</sup>; CVLT-II=California Verbal Learning Test-II<sup>4</sup>;TMT=Trail Making Test<sup>5</sup>; ROCFT=Rey-Osterreith Complex Figure Test<sup>6,7</sup>; Paced Auditory Serial Attention Test<sup>8</sup>; WAIS-III=Wechsler Adult Intelligence Scale-3rd Edition<sup>9</sup>; WMS-III=Wechsler Memory Scale-3<sup>rd</sup> Edition<sup>10</sup>

Note: WAIS and WMS tests at BL, 6-, and 12-month visits are the 3<sup>rd</sup> edition; 4<sup>th</sup> edition tests were used at the 3-6 year visit, which are highly correlated to the 3<sup>rd</sup> edition tests. The Stroop test was not administered at the 3-6 year visit. Also of note, 20 participants were missing WAIS-III Digit Span data at BL.

1. Comalli PE, Wapner S, Werner H. Interference Effects of Stroop Color-Word Test in Childhood, Adulthood, and Aging. *J Genet Psychol.* 1962;100(1):47-53. doi:10.1080/00221325.1962.10533572
2. Klove H. Clinical Neuropsychology. *Med Clin North Am.* 1963;47:1647-1658. [http://www.ncbi.nlm.nih.gov/entrez/query.fcgi?cmd=Retrieve&db=PubMed&dopt=Citation&list\\_uids=14078168](http://www.ncbi.nlm.nih.gov/entrez/query.fcgi?cmd=Retrieve&db=PubMed&dopt=Citation&list_uids=14078168).
3. Benedict RH. *Brief Visuospatial Memory Test - Revised*. Odessa, FL: Psychological Assessment Resources, Inc.; 1997.
4. Delis Kaplan, E., Kramer, J.H. DC, Delis DC/KEJH. California Verbal Learning Test-II. 2000.
5. Reitan RM. Validity of the Trail Making Test as an indicator of organic brain damage. *Percept Mot Skills.* 1958;8:271-276. doi:10.2466/pms.8.7.271-276
6. Strauss E, Sherman EMS, Spreen O. *A Compendium of Neuropsychological Tests*. 3rd ed. New York: Oxford University Press; 2006.
7. Mitrushina M, Boone KB, Razani J, D'Elia LF. *Handbook of Normative Data for*

- Neuropsychological Assessment*. Oxford University Press; 2005.
8. Gronwell DMA. Paced auditory serial-addition task: A measure of recovery from concussion. *Percept Mot Skills*. 1977;44:367-373.
  9. Wechsler D. *WAIS-III, Wechsler Adult Intelligence Scale: Administration and Scoring Manual*. Psychological Corporation; 1997.
  10. Wechsler D. *Wechsler Memory Scale-Third Edition*. 1997.
